# Supplementary material for: Seabird colonies as important global drivers in the nitrogen and phosphorus cycles
Source: PubMed Central journal article supplement (PMC5780392; doi:10.1038/s41467-017-02446-8), 2018-01-23
Supplement: 41467_2017_2446_MOESM1_ESM.pdf [file 41467_2017_2446_MOESM1_ESM.pdf]

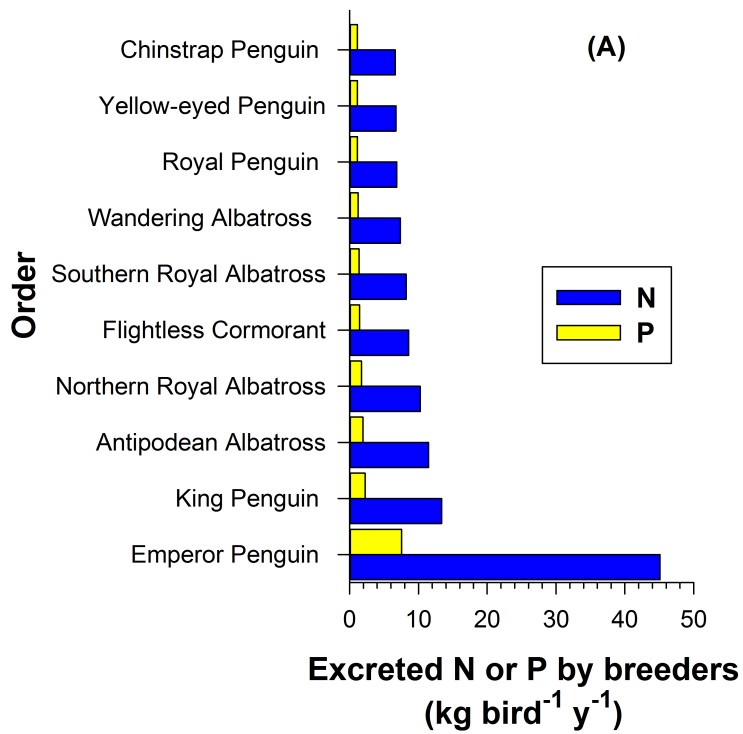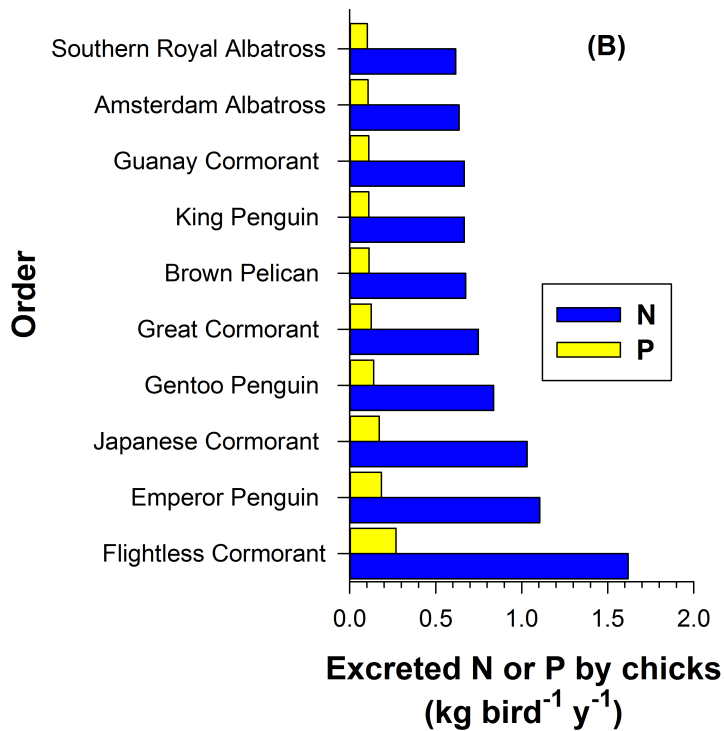

**Supplementary Figure 1.** Excretion of N and P per seabird: (A) adults, and (B) chicks.

**Supplementary Table 1.** Size of nitrogen major compartments/reservoirs and fluxes between them.

| Compartment/reservoir         | Mass of N<br>(Ggx10 <sup>9</sup> ) | Reference |
|-------------------------------|------------------------------------|-----------|
| Atmospheric N <sub>2</sub>    | 3950                               | 15; 5     |
| Nitrogen in sedimentary rocks | 0.9996                             | 9         |
| Ocean:                        |                                    | 5         |
| N <sub>2</sub>                | 20                                 |           |
| NO <sub>3</sub> <sup>-</sup>  | 0.57                               |           |
| Organic soils                 | 0.19                               | 9         |
| Land biota                    | 0.00010                            | 9         |
| Marine biota                  | 0.00050                            | 9         |
| Nitrogen sequestered in ice   | 0.000000260                        | 21        |

  

| Compartment/reservoir                                                              | Fluxes of N<br>(Gg y <sup>-1</sup> x10 <sup>3</sup> ) | Reference  |
|------------------------------------------------------------------------------------|-------------------------------------------------------|------------|
| Atmospheric N <sub>2</sub> fixed by biological process                             | 58                                                    | 18; 4      |
| Nitrogen fixation in oceans                                                        | 140                                                   | 20         |
| Lightning                                                                          | 5                                                     | 4          |
| Nitrogen fixation by agricultural crops                                            | 50-70                                                 | 6          |
| Legume cultivation                                                                 | 40                                                    | 1          |
| Rice cultivation                                                                   | 5.0                                                   | 1          |
| Nitrogen buried in deep ocean sediments                                            | 20                                                    | 20         |
| N <sub>2</sub> O emissions from ocean to atmosphere                                | 0.5-5.5                                               | 19; 4      |
| Nitrogen input into the ocean by rivers                                            | 66                                                    | 14         |
| Nitrogen input into the ocean by ground water                                      | 4                                                     | 19         |
| Atmospheric deposition on ocean                                                    | 8.4                                                   | 5          |
| N transfer from surface ocean to land via fishing activities                       | 3.7                                                   | 10         |
| Ornithotrofication. Transfer of N from surface ocean to land by seabirds. Total N: |                                                       | This study |
| Breeding seabirds                                                                  | 0.60                                                  |            |
| Total population                                                                   | 3.80                                                  |            |
| Labile (leachable)                                                                 | 0.07                                                  |            |

**Supplementary Table 2.** Major compartments/reservoirs of phosphorous in the Earth's surface and fluxes between the different compartments (adapted from 12).

| <b>Compartment/reservoir</b>                                                              | <b>Mass of P<br/>(Gg<math>\times 10^6</math>)</b>                    | <b>Reference</b>                       |
|-------------------------------------------------------------------------------------------|----------------------------------------------------------------------|----------------------------------------|
| Land soil (soil<60 cm depth)                                                              | 96.1-206                                                             | 8; 13                                  |
| Land biota                                                                                | 2.6-3.0                                                              | 8; 13                                  |
| Surface ocean (<300m depth)                                                               | 2.6                                                                  | 8; 13                                  |
| Oceanic biota                                                                             | 0.050-0.138                                                          | 8; 13; 7; 9                            |
| Atmospheric P                                                                             | 0.00003                                                              | 13; 7; 9                               |
| Domestic animals                                                                          | 0.0323                                                               | Present study using data from 3 and 17 |
| <b>Compartment/reservoir</b>                                                              | <b>Fluxes of P<br/>(Gg P y<sup>-1</sup><math>\times 10^3</math>)</b> | <b>Reference</b>                       |
| Rock/sediment → soil<br>(weathering, soil accumulation)                                   | 20                                                                   | 11; 9                                  |
| Soil → rock/sediment (deep<br>burial, lithification)                                      | 9.3-19                                                               | 8; 9                                   |
| Soil → land biota                                                                         | 62-200                                                               | 8; 7                                   |
| Soil → surface ocean (present-<br>day river dissolved P):                                 |                                                                      |                                        |
| Dissolved inorganic P                                                                     | 0.8-1.4                                                              | 2; 12                                  |
| Dissolved organic P                                                                       | 0.2                                                                  |                                        |
| Soil → surface ocean (present-<br>day total river P)                                      | 17.3-20.1                                                            | 2; 12                                  |
| Atmosphere → land soil                                                                    | 3.10                                                                 | 9                                      |
| Atmosphere → surface ocean                                                                | 0.60 - 1.50                                                          | 13; 7                                  |
| Surface ocean → atmosphere                                                                | 0.31                                                                 | 13; 7                                  |
| Surface ocean → land (fisheries)                                                          | 0.32                                                                 | 9                                      |
| Ornithotrophication. Transfer of P<br>from surface ocean to land by<br>seabirds. Total P: |                                                                      | This study                             |
| Breeding seabirds                                                                         | 0.10                                                                 |                                        |
| Total population                                                                          | 0.63                                                                 |                                        |
| Labile (leachable) P                                                                      | 0.02                                                                 |                                        |

**Supplementary Table 3.** Mean concentrations of total and labile (soluble) N and P ( $\text{mg kg}^{-1}$ ) in seabird faecal materials.

| Element  | Charadriiformes<br>( $\text{mg kg}^{-1}$ ) | Reference           | Pelecaniiformes<br>( $\text{mg kg}^{-1}$ ) | Reference | Procellariiformes<br>( $\text{mg kg}^{-1}$ ) | Reference | Sphenisciformes<br>( $\text{mg kg}^{-1}$ ) | Reference  |
|----------|--------------------------------------------|---------------------|--------------------------------------------|-----------|----------------------------------------------|-----------|--------------------------------------------|------------|
| Total N  | 67708                                      | 2,3,4,5,6,7,8,9     | 105400                                     | 4         | 175833                                       | 13,14     | 113781                                     | 3,16,17,19 |
| Labile N | 5715                                       | 2,6,7,8,9           | 13340                                      | *         | 31860                                        | 13        | 12982                                      | 16,17      |
| Total P  | 24782                                      | 2,4,5,6,7,8,9,10,11 | 92933                                      | 4         | 17600                                        | 13,14,15  | 45244                                      | 19,20,21   |
| Labile P | 6613                                       | 7,8,9,10,11         | 15000                                      | 10        | 3768                                         | *         | 9685                                       | *          |

Labile N comprises  $\text{NO}_3^-$  and  $\text{NH}_4^+$  soluble in water or neutral salts (e.g., KCl or  $\text{MgCl}_2$  1M), whereas labile P includes also the phosphate soluble in Mehlich 3 extractant (0.2N  $\text{CH}_3\text{COOH}$ -0.25N  $\text{NH}_4\text{NO}_3$ -0.015N  $\text{NH}_4\text{F}$ -0.013N  $\text{HNO}_3$ -0.001M EDTA). \*No data available for the N and P labile forms. For these particular cases, the labile forms of N and P were calculated based on average labile values of these two elements that were applied to the total seabird population.

## References

1. Canfield, D., Thamdrup, B. & Kristensen, E. *Aquatic Geomicrobiology*. Advances in Marine Biology Vol. 48. (Elsevier, Amsterdam, The Netherlands, 2005).
2. Compton, J. et al. in *Marine Authigenesis: From Global to Microbial* (eds Glenn, C. R., Prévôt-Lucas, L. & Lucas, J.) 21-33 (SEPM Special Publication N° 66, 2000).
3. FAOSTAT, Food and agriculture organization of the United Nations, Statistical Database, (<http://faostat.fao.org>, 2015).
4. Fowler, D. et al. The global nitrogen cycle in the twenty-first century. *Phil. Trans. R. Soc. B* **368**, 20130164 (2013).
5. Galloway, J. N. et al. The nitrogen cascade. *BioScience* **53**, 341-356 (2003).
6. Herridge, D. F., Peoples, M. B. & Boddey, R. M. Global inputs of biological nitrogen fixation in agricultural systems. *Plant Soil* **311**, 1-18 (2008).
7. Jahnke, R. A. in *Global Biogeochemical Cycles*. (eds Butcher, S. S., Charlson, R. J., Orians, G. H., & Wolff, G. V.) 301-315. (Academic Press, London, UK, 1992).
8. Lerman, A., Mackenzie, F. T. & Garrels, R. M. Modeling of geochemical cycles: phosphorus as an example. *Geol. Soc. Am. Memoirs* **142**, 205-217 (1975).
9. Mackenzie, F.T. et al. in *Interactions of C, N, P and S Biogeochemical Cycles and Global Change* (eds Wollast, R., Mackenzie, F. T., & Chou, L.) vol. 4. 1-61 (Springer-Verlag, Berlin Heidelberg, 1993).
10. Maranger, R., Caraco, N., Duhamel, J. & Amyot, M. Nitrogen transfer from sea to land via commercial fisheries. *Nat. Geosci.* **2**, 111-113 (2008).
11. Meybeck, M. Carbon, nitrogen, and phosphorus transport by world rivers. *Am. J. Sci.* **282**, 401-450 (1982).
12. Paytan, A. & McLaughlin, K. The oceanic phosphorous cycle. *Chem. Rev.* **107**, 563-576 (2007).
13. Richey, J. E. in *The Major Biogeochemical Cycles and Their Interactions* (eds Bolin, B. & Cook, R. B.) 51-56 (John Wiley & Sons, Chichester, UK, 1983).
14. Ruttenberg, K. C. in *Biogeochemistry* (ed Schlesinger, W. H.) Vol. 8, 585-643, *Treatise on Geochemistry* (eds Holland, H. D. & Turekian, K. K.) (Elsevier-Pergamon, Oxford, 2003).
15. Schlesinger, W. *Biogeochemistry: An Analysis of Global Change*. (Academic Press, Amsterdam, The Netherlands, 1997).
16. Seitzinger, S. P., Harrison, J. A., Dumont, E., Beusen, A. H. W & Bouwman, A. F. Sources and delivery of carbon, nitrogen, and phosphorus to the coastal zone: An overview of Global Nutrient Export from Watersheds (NEWS) models and their application. *Global Biogeochem. Cycles* **19**, gb4s01, doi:10.1029/2005gb002606 (2005).
17. Sheldrick, W., Syers, J. K. & Lingard, J. Contribution of livestock excreta to nutrient balances. *Nutr. Cycling Agroecosyst.* **66**, 119-131 (2003).
18. Vitousek, P. M., Menge, D. N. L., Reed, S. C. & Cleveland, C. C. Biological nitrogen fixation: rates, patterns, and ecological controls in terrestrial ecosystems. *Phil. Trans. R. Soc. B* **368**, 20130119 (2013).

19. Voss, M. et al. in *The European Nitrogen Assessment* (eds Sutton, M. A. et al.) 147-176 (Cambridge University Press, New York, 2011).
20. Voss, M. et al. The marine nitrogen cycle: recent discoveries, uncertainties and the potential relevance of climate change. *Phil. Trans. R. Soc. B* **368**, 20130121 (2013).
21. Wolff, E. W. Ice sheets and nitrogen. *Phil. Trans. R. Soc. B* **368**, 20130127 (2013).
22. Mehlich, A. Mehlich 3 soil test extractant: a modification of the mehlich 2 extractant. *Commun. Soil Sci. Plant Anal.* **15**, 1409-1416 (1984).
23. Sobey, G. G. & Kenworthy, J. B. The relationship between herring gulls and the vegetation of their breeding colonies. *J. Ecol.* **67**, 469-496 (1979).
24. Mizutani, H. & Wada, E. Nitrogen and Carbon Isotope Ratios in Seabird Rookeries and their Ecological Implications. *Ecology* **69** (2), 340-349 (1988).
25. Hahn, S., Bauer, S. & Klaassen, M. Estimating the contribution of carnivorous waterbirds to nutrient loading in freshwater habitats. *Freshw. Biol.* **52**, 2421-2433 (2007).
26. Otero, X. L. & Mouriño, J. Nitrógeno (NH<sub>4</sub><sup>+</sup>, NO<sub>3</sub><sup>-</sup>), Fósforo asimilable y metales traza (Hg, Cd, Pb, Zn, Ni y Cu) en suelos de la colonia de la gaviota patiamarilla (*Larus cachinnans*) en el Parque natural de las Islas Cíes. *Cuad. Soc. Esp. Cien. For.* **14**, 143-149 (2002).
27. Smith, J. S. & Johnson, C. R. Nutrient inputs from seabirds and humans on a populated coral cay. *Mar. Ecol. Prog. Ser.* **124**, 189-200 (1995).
28. Otero, X. L. et al. Phosphorus in seagull colonies and the effect on the habitats. The case of yellow-legged gulls (*Larus michahellis*) in the Atlantic Islands National Park (Galicia-NW Spain). *Sci. Total Environ.* **532**, 383-397 (2015).
29. Otero, X. L. *Monitorización de los procesos biogeoquímicos en la colonia de Larus cachinnans del Parque Nacional de las Islas Atlánticas*. Organismo Autónomo Parques Nacionales. Ministerio de Agricultura, Pesca, Alimentación y Medio Ambiente. Madrid, Unpublished report (2016).
30. Loder III, T. C., Ganning, B. & Love, J. A. Ammonia nitrogen dynamics in coastal rockpools affected by gull guano. *J. Exp. Mar. Biol. Ecol.* **196**, 113-129 (1996).
31. Zhu, R. B. et al. Greenhouse gas emissions from penguin guanos and ornithogenic soils in coastal Antarctica: effects of freezing–thawing cycles. *Atmos. Environ.* **43**, 2336-2347 (2009).
32. Yan, H., Yuhong, W., Wenhan, C. & Liguang, S. Millennial mercury records derived from ornithogenic sediment on Dongdao Island, South China Sea. *J. Environ. Sci.* **23**, 1415-1423 (2011).
33. Fugler, S. R. Chemical composition of guano of burrowing petrel chicks (*Procellariidae*) at Marion Island. in *Antarctic Nutrient Cycles and Food Webs* (eds Siegfried, W. R., Condy, P. R. & Laws, R. M.) 169-172 (Springer-Verlag, Berlin Heidelberg, 1985).
34. Bancroft, W. J., Garkaklis, M. J. & Roberts, J. D. Burrow building in seabird colonies: a soil-forming process in island ecosystems. *Pedobiologia* **49**, 149-165 (2005).
35. Brimble, S. K. et al. High arctic ponds receiving biotransported nutrients from a nearby seabird colony are also subject to potentially toxic loadings of arsenic, cadmium and zinc. *Environ. Toxicol. Chem.* **28**, 2426-2433 (2009).

36. Zhu, R., Sun, J., Liu, Y., Gong, Z. & Sun, L. Potential ammonia emissions from penguin guano, ornithogenic soils and seal colony soils in coastal Antarctica: effects of freezing-thawing cycles and selected environmental variables. *Antarct. Sci.* **23** (1), 78-92 (2011).
37. Lindeboom, H. J. The nitrogen pathway in a penguin rookery. *Ecology* **65**, 269-277 (1984).
38. Mizutani, H., Kabaya, Y. & Wada, E. Ammonia volatilization and high <sup>15</sup>N/<sup>14</sup>N ratio in a penguin rookery in Antarctica. *Geochem. J.* **19**, 323-327 (1985).
39. Zhu, R., Yashu, L., Jianjun, S., Liguang, S. & Jinju, G. Stimulation of gaseous phosphine production from Antarctic seabird guanos and ornithogenic soils. *J. Environ. Sci.* **21**, 150–154 (2009).
40. Metcheva, R., Yurukova, L. & Teodorova, S. E. Biogenic and toxic elements in feathers, eggs, and excreta of Gentoo penguin (*Pygoscelis papua ellsworthii*) in the Antarctic. *Environ. Monit. Assess.* **182**, 571-585 (2011).
41. Xianyan, Q. et al. From sea to land: assessment of the bio-transport of phosphorus by penguins in Antarctica. *Chin. J. Oceanol. Limnol.* **1**, 148–154 (2014).
42. Zhu, R. et al. Tropospheric Phosphine and Its Sources in Coastal Antarctica. *Environ. Sci. Technol.* **40**, 7656-7661 (2006).
