# Supplementary material for: Seabird colonies as important global drivers in the nitrogen and phosphorus cycles
Source: PubMed Central journal article supplement (PMC5780392; doi:10.1038/s41467-017-02446-8), 2018-01-23
Supplement: 41467_2017_2446_MOESM3_ESM.pdf [file 41467_2017_2446_MOESM3_ESM.pdf]

## **Description of Additional Supplementary Files**

File Name: Supplementary Data 1

Description: Size of the worldwide seabird population arranged by species, with their corresponding amounts of excreted N and P.

File Name: Supplementary Data 2

Description: Geographic coordinates with their corresponding N and P excreted every year.
